# Supplementary material
Source: Elsevier journal article supplement (https://comptes-rendus.academie-sciences.fr/biologies/article/10.1016/j.crvi.2015.12.001/file/attach/mmc1.pdf)
Supplement: mmc1 [file mmc1.pdf]

## Supplementary material

Marine turtles used to assist Austronesian sailors reaching new islands

Lucienne Wilmé, Patrick O. Waeber, Joerg U. Ganzhorn

Table S1. Total area of the three oceans between 35N and 35S, and total area and percentage of islands in each ocean.

|                                              | Area (km <sup>2</sup> ) | %           |
|----------------------------------------------|-------------------------|-------------|
| Atlantic                                     |                         |             |
| islands                                      | 312,800                 | 0.62        |
| ocean                                        | 50,267,000              |             |
| Indian                                       |                         |             |
| islands                                      | 1,401,400               | 3.02        |
| including Madagascar                         | 594,200                 | 1.30        |
| including islands between Asia and Australia | 718,400                 | 1.57        |
| ocean                                        | 44,943,400              |             |
| Pacific                                      |                         |             |
| islands                                      | 2,488,600               | 2.03        |
| including islands between Asia and Australia | 2,282,600               | 1.87        |
| <b>remaining islands</b>                     | <b>212,100</b>          | <b>0.17</b> |
| ocean                                        | 119,852,000             |             |

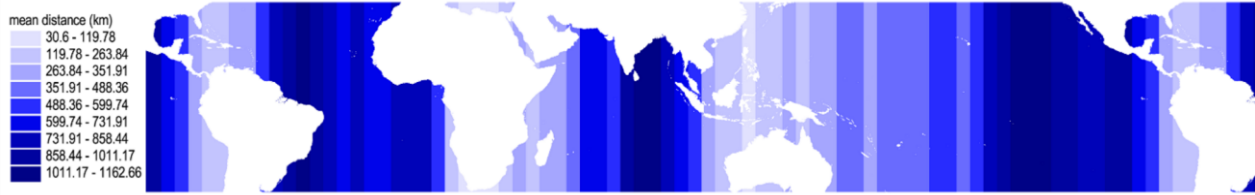

Fig. S1. Distance to nearest land for each point in longitudinal bands of 5°.

Table S2. Mean distance to nearest land for point in longitudinal bands of 5°.

| <b>Longitudinal band</b> | <b>Mean distance (km)</b> | <b>SD</b> | <b>N</b> | <b>min</b> | <b>max</b> |
|--------------------------|---------------------------|-----------|----------|------------|------------|
| 180W–175W                | 403.3                     | 291.0     | 350      | 7          | 1,127      |
| 175W–170W                | 398.0                     | 251.2     | 349      | 19         | 1,003      |
| 170W–165W                | 569.8                     | 300.3     | 350      | 11         | 1,304      |
| 165W–160W                | 584.6                     | 346.5     | 350      | 38         | 1,481      |
| 160W–155W                | 488.4                     | 361.4     | 349      | 8          | 1,409      |
| 155W–150W                | 578.3                     | 345.7     | 350      | 7          | 1,596      |
| 150W–145W                | 762.6                     | 444.1     | 350      | 3          | 1,833      |
| 145W–140W                | 897.5                     | 627.5     | 349      | 7          | 1,999      |
| 140W–135W                | 1,053.4                   | 707.7     | 350      | 4          | 2,219      |
| 135W–130W                | 1,121.0                   | 594.8     | 350      | 53         | 2,250      |
| 130W–125W                | 1,099.8                   | 501.1     | 350      | 16         | 2,013      |
| 125W–120W                | 1,011.2                   | 547.6     | 350      | 7          | 2,073      |
| 120W–115W                | 942.9                     | 550.2     | 337      | 7          | 2,121      |
| 115W–110W                | 804.8                     | 592.6     | 313      | 7          | 2,098      |
| 110W–105W                | 796.7                     | 580.6     | 295      | 8          | 2,055      |
| 105W–100W                | 986.5                     | 406.6     | 265      | 8          | 1,792      |
| 100W–95W                 | 932.8                     | 472.2     | 278      | 8          | 1,766      |
| 95W–90W                  | 730.5                     | 523.2     | 306      | 7          | 1,776      |
| 90W–85W                  | 555.1                     | 356.4     | 294      | 6          | 1,401      |

| <b>Longitudinal band</b> | <b>Mean distance (km)</b> | <b>SD</b> | <b>N</b> | <b>min</b> | <b>max</b> |
|--------------------------|---------------------------|-----------|----------|------------|------------|
| 85W–80W                  | 298.5                     | 231.9     | 295      | 2          | 974        |
| 80W–75W                  | 215.1                     | 164.7     | 256      | 7          | 662        |
| 75W–70W                  | 222.6                     | 169.7     | 190      | 2          | 659        |
| 70W–65W                  | 299.4                     | 190.6     | 118      | 8          | 729        |
| 65W–60W                  | 298.4                     | 233.7     | 125      | 4          | 838        |
| 60W–55W                  | 528.5                     | 291.0     | 144      | 7          | 1,099      |
| 55W–50W                  | 818.6                     | 427.4     | 165      | 7          | 1,510      |
| 50W–45W                  | 946.1                     | 621.5     | 226      | 5          | 1,934      |
| 45W–40W                  | 1,157.2                   | 695.7     | 253      | 2          | 2,206      |
| 40W–35W                  | 981.5                     | 579.7     | 309      | 8          | 2,086      |
| 35W–30W                  | 801.0                     | 410.4     | 350      | 32         | 1,617      |
| 30W–25W                  | 716.6                     | 318.1     | 350      | 18         | 1,595      |
| 25W–20W                  | 765.4                     | 365.1     | 350      | 8          | 1,777      |
| 20W–15W                  | 673.2                     | 538.2     | 334      | 3          | 2,062      |
| 15W–10W                  | 731.9                     | 572.9     | 251      | 7          | 2,186      |
| 10W–5W                   | 775.8                     | 528.2     | 205      | 17         | 2,078      |
| 5W–0                     | 858.4                     | 481.4     | 200      | 48         | 2,043      |
| 0–5E                     | 857.3                     | 363.7     | 206      | 8          | 1,613      |
| 5E–10E                   | 522.4                     | 287.5     | 195      | 3          | 1,154      |
| 10E–15E                  | 251.9                     | 177.9     | 113      | 8          | 699        |
| 15E–20E                  | 119.8                     | 75.4      | 18       | 17         | 264        |
| 20E–25E                  | 30.6                      | 22.0      | 5        | 7          | 50         |
| 25E–30E                  | 99.3                      | 62.1      | 9        | 15         | 216        |
| 30E–35E                  | 201.2                     | 150.2     | 41       | 7          | 543        |
| 35E–40E                  | 282.0                     | 255.8     | 114      | 3          | 937        |
| 40E–45E                  | 263.8                     | 264.6     | 176      | 1          | 1,049      |
| 45E–50E                  | 302.4                     | 268.5     | 174      | 7          | 1,059      |
| 50E–55E                  | 333.0                     | 284.9     | 270      | 3          | 1,270      |

| <b>Longitudinal band</b> | <b>Mean distance (km)</b> | <b>SD</b> | <b>N</b> | <b>min</b> | <b>max</b> |
|--------------------------|---------------------------|-----------|----------|------------|------------|
| 55E–60E                  | 458.3                     | 346.2     | 281      | 7          | 1,501      |
| 60E–65E                  | 687.0                     | 351.4     | 300      | 17         | 1,638      |
| 65E–70E                  | 639.5                     | 340.0     | 296      | 7          | 1,740      |
| 70E–75E                  | 589.8                     | 547.6     | 269      | 8          | 1,964      |
| 75E–80E                  | 983.6                     | 628.3     | 223      | 8          | 2,275      |
| 80E–85E                  | 1162.7                    | 751.0     | 256      | 8          | 2,641      |
| 85E–90E                  | 1,090.1                   | 649.5     | 281      | 8          | 2,701      |
| 90E–95E                  | 763.7                     | 643.7     | 277      | 3          | 2,263      |
| 95E–100E                 | 636.3                     | 590.2     | 233      | 5          | 1,799      |
| 100E–105E                | 599.7                     | 453.7     | 199      | 3          | 1,341      |
| 105E–110E                | 351.9                     | 288.0     | 233      | 5          | 912        |
| 110E–115E                | 223.9                     | 169.5     | 238      | 7          | 752        |
| 115E–120E                | 161.0                     | 142.9     | 189      | 2          | 615        |
| 120E–125E                | 84.7                      | 74.7      | 226      | 4          | 340        |
| 125E–130E                | 171.8                     | 159.1     | 246      | 1          | 683        |
| 130E–135E                | 260.4                     | 236.2     | 230      | 5          | 913        |
| 135E–140E                | 306.7                     | 219.8     | 233      | 7          | 892        |
| 140E–145E                | 221.9                     | 138.9     | 218      | 8          | 569        |
| 145E–150E                | 293.5                     | 214.1     | 261      | 6          | 911        |
| 150E–155E                | 341.5                     | 266.9     | 315      | 3          | 1,141      |
| 155E–160E                | 424.8                     | 256.2     | 349      | 8          | 1,252      |
| 160E–165E                | 431.2                     | 313.6     | 348      | 3          | 1,522      |
| 165E–170E                | 343.4                     | 378.6     | 348      | 2          | 1,658      |
| 170E–175E                | 438.7                     | 303.5     | 350      | 21         | 1,346      |
| 175E–180E                | 471.6                     | 292.3     | 349      | 8          | 1,164      |
